# Supplementary material
Source: PubMed Central journal article supplement (PMC3632350)
Supplement: NIHMS442725-supplement-supplement_1.pdf [file NIHMS442725-supplement-supplement_1.pdf]

## Supplementary Figure 1

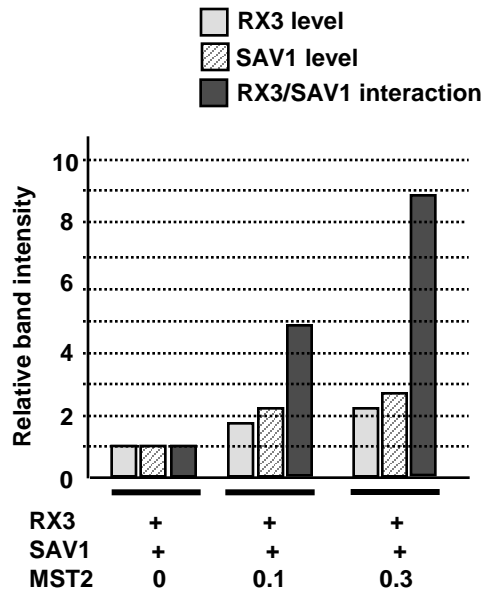

### Supplementary Figure 1. Densitometric analysis of Fig. 1C.

The band intensities of RUNX3, SAV1 and the interaction of the two proteins (SAV1/RX3) of the Figure 1C were analyzed by Luminescent image analyzer (Fuji film LAS-3000) and the relative intensities are depicted as a bar diagram. .

## Supplementary Figure 2

| Phosphorylation sites | Peptide Scan (Peptide Hits)                                            | Molecular Weight | Charge | Xcor |
|-----------------------|------------------------------------------------------------------------|------------------|--------|------|
| T69, S77, S81         | R.T <sup>A</sup> DSPNFLCS <sup>A</sup> VLPS <sup>A</sup> HWR.C (18/48) | 2098.89          | 1.60   | 1    |
| S71, S77, S81         | R.TDS <sup>A</sup> PNFLCS <sup>A</sup> VLPS <sup>A</sup> HWR.C (22/60) | 2098.89          | 1.63   | 2    |
| S153                  | R.AIKVT <sup>A</sup> VDGPREPR.R (18/48)                                | 1517.82          | 1.62   | 1    |
| S17                   | R.FTPPS <sup>A</sup> PAFCGGGGGKM (10.30)                               | 1627.69          | 1.48   | 1    |

**Supplementary Figure 2. Identification of phosphorylation sites by LC-MS/MS** HEK293 cells transfected with expression plasmids for *Myc-RUNX3*, *SAVI* and *MST2* (or *MST2-K56R* for negative control) and purified by pull down with G-Sepharose-anti-Myc antibody beads. The bounded protein was separated by 10% SDS-PAGE, and the corresponding RUNX3 band was in gel digested by trypsin and analyzed by tandem mass spectrometry (MS/MS) using an LTQ linear ion trap mass spectrometer (Thermo Electron). Assignment of MS/MS data was performed using SEQUEST software (Thermo Electron). Resultant matches were entered and compiled into a MySQL database, and proteomics computational analyses were performed using a Hypertext Preprocessor (PHP)-based program. First, peptide identifications were made based on the following criteria: cross-correlation score > 1.5, 2.0 and 2.5 for charge states +1, +2 and +3, respectively; delta correlation > 0.1; primary score > 200; ranking of the primary score < 3; and percent fragment ions > 30%. Second, protein identifications were assigned when the following criteria were met: the unique peptide match number was greater than or equal to two, the peptides contributing to protein matches were derived from a single gel slice or from adjacent slices, and the protein was identified in at least two vitreous samples.

### Supplementary Figure 3

Si-RUNX3(1) -HSS101407 5'-AGU UCU CGU CAU UGC CUG CCA UCA C-3'  
Si-RUNX3(2) -HSS101408 5'-UUG GUG AAC ACA GUG AUG GUC AGG G-3'  
Si-RUNX3(3) -HSS101409 5'-UGA AGU GGC UUG UGG UGC UGA GUG A-3'

Si-SAV1(1) -HSS127048 5'-AAA UUC GGA UGA CUC AAC UCG UUC C-3'  
Si-SAV1(2) -HSS127049 5'-UUC AUG UGC ACG AUC UCC AAG UGG C-3'  
Si-SAV1(3) -HSS127050 5'-UAA AUC UUC AGA ACC AUG GUU AGU C-3'

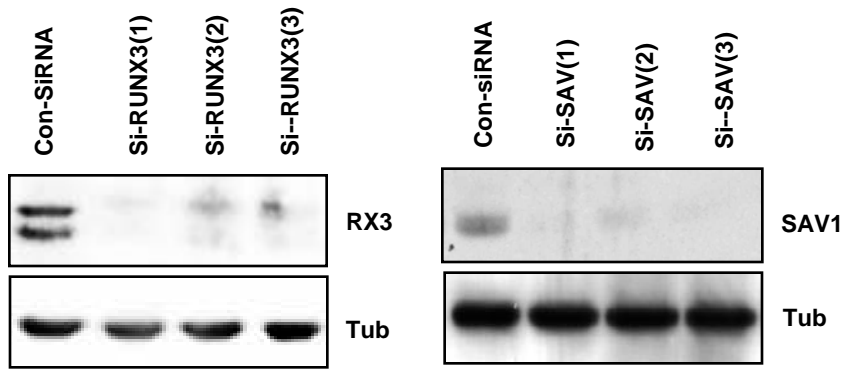

#### Supplementary Figure 3. Knockdown of *SAV1* and *RUNX3*.

HEK293 cells were transfected with siRNAs against *SAV1* or *RUNX3* and knockdown of endogenous *SAV1* and *RUNX3* were measured by IB with anti-*SAV1* or anti-*RUNX3* antibody.
